# Supplementary material
Source: Elsevier journal article supplement (https://rcastoragev2.blob.core.windows.net/675c16e57dbcae03667a2d98fbcd7042/mmc1.pdf)
Supplement: mmc1 [file mmc1.pdf]

**Cell Reports, Volume 23**

## **Supplemental Information**

### **Pan-Cancer Analysis of lncRNA Regulation**

#### **Supports Their Targeting of Cancer**

#### **Genes in Each Tumor Context**

**Hua-Sheng Chiu, Sonal Somvanshi, Ekta Patel, Ting-Wen Chen, Vivek P. Singh, Barry Zorman, Sagar L. Patil, Yinghong Pan, Sujash S. Chatterjee, The Cancer Genome Atlas Research Network, Anil K. Sood, Preethi H. Gunaratne, and Pavel Sumazin**

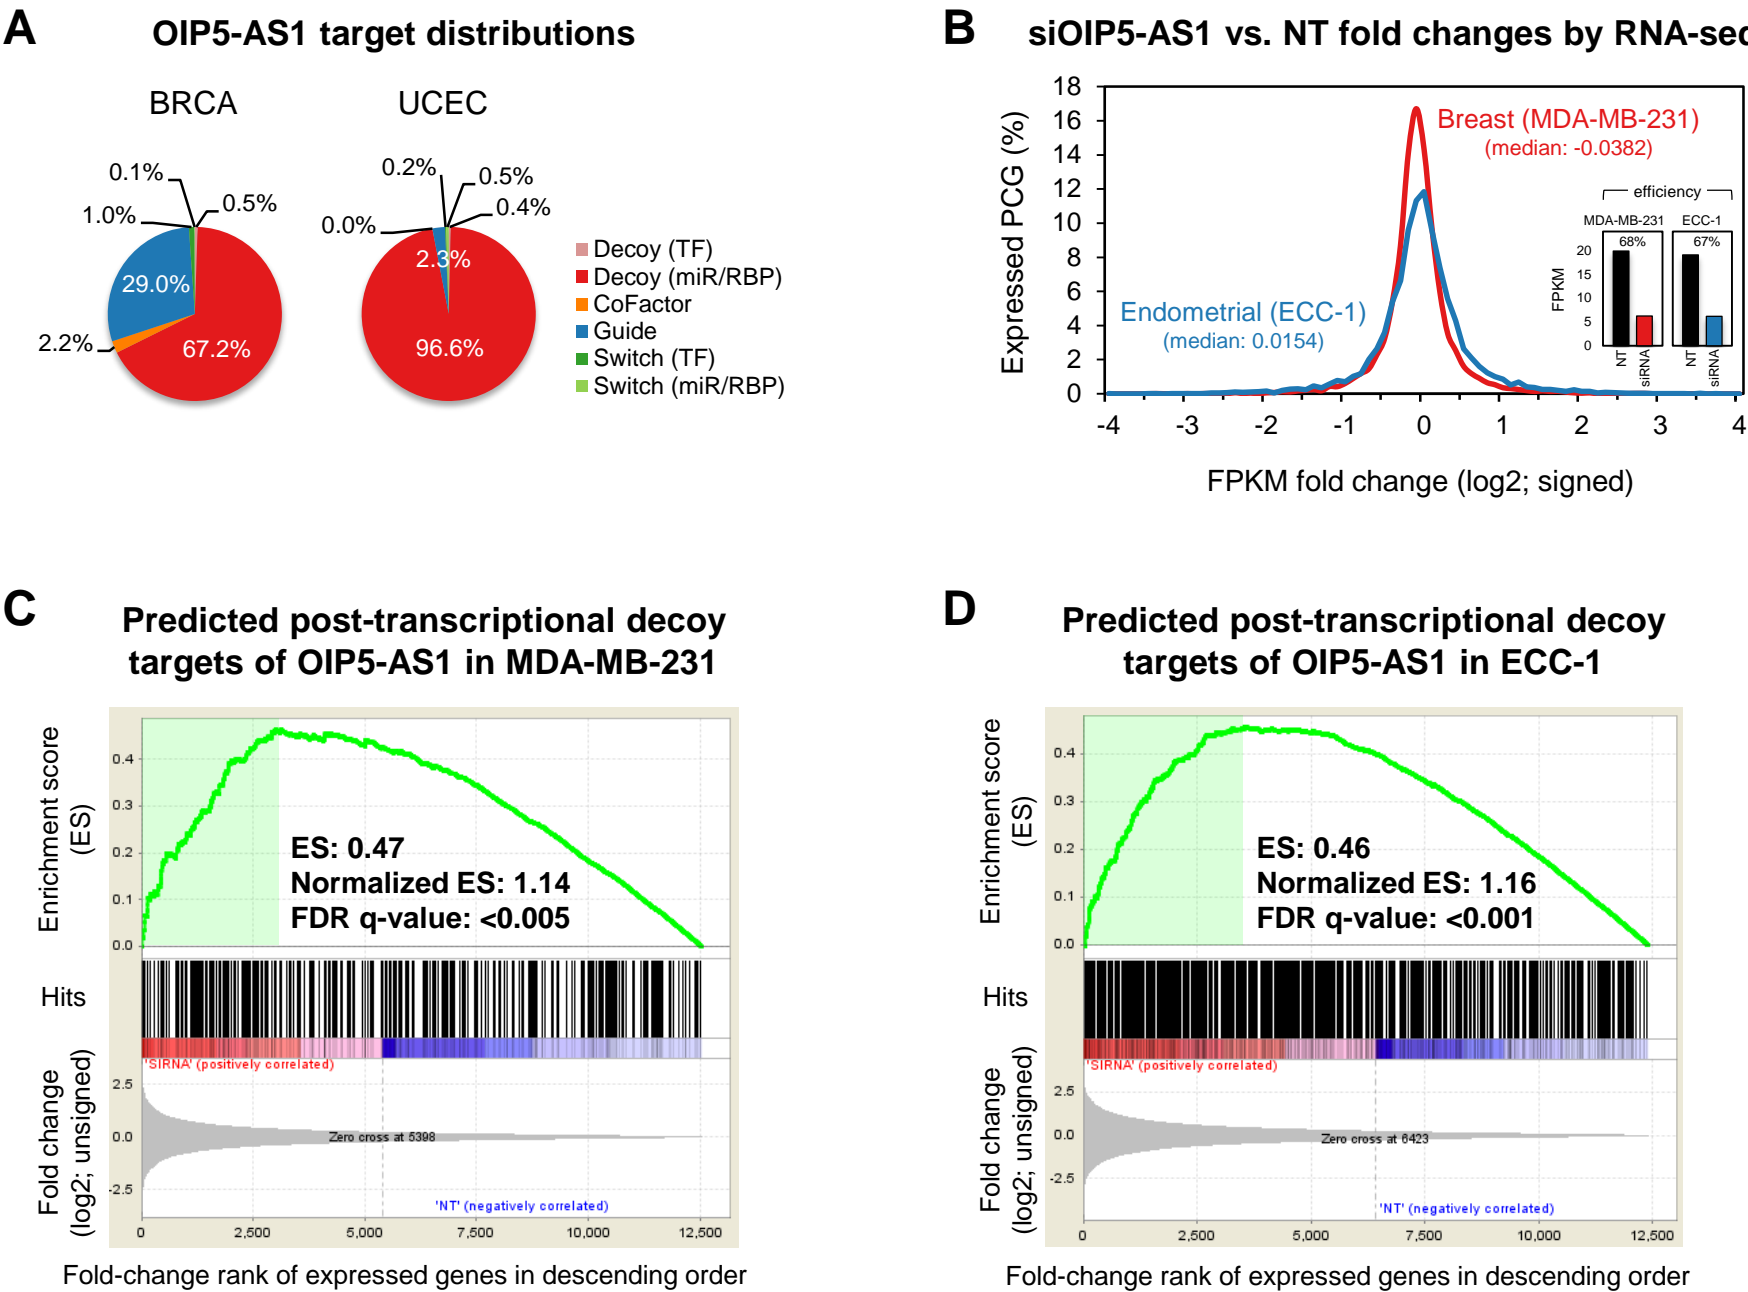

**Figure S1.** The majority of the predicted and expressed OIP5-AS1 post-transcriptional targets were downregulated following siOIP5-AS1 transfections in MDA-MB-231 and ECC-1. **(A)** OIP5-AS1 was inferred to regulate most of its targets as a post-transcriptional decoy in BRCA and UCEC. **(B)** Fold changes after siOIP5-AS1 and NT transfections of expressed PCGs (FPKM>0.1 in both siOIP5-AS1 and NT, and nonzero MAD score in TCGA tumor data) were near 0. The *oip5-as1* expression is inset to demonstrate its silencing. **(C)** GSEA analysis of expressed predicted post-transcriptional decoy targets in MDA-MB-231 and **(D)** ECC-1; all expressed genes were sorted by siOIP5-AS1 to NT absolute fold changes, GSEA used weighted enrichment statistics and ratio of classes, with p-values computed using 1k gene-set permutations. Related to Figure 6.
